# Supplementary material
Source: PubMed Central journal article supplement (PMC4192026)
Supplement: NIHMS605952-supplement-Supplemental_methods_tables.pdf [file NIHMS605952-supplement-Supplemental_methods_tables.pdf]

## Supplemental Methods Table 1. Mouse and Human p53 Target Genes Primers

| Supplemental Methods Table 1a: Mouse qRT-PCR Primer List |                                |
|----------------------------------------------------------|--------------------------------|
| p53 F:                                                   | GGG GAG GAG CCA GGC CAT CA     |
| p53 R:                                                   | CCG CGC CAT GGC CAT CTA CA     |
| Killer/Dr5 F:                                            | GAG GGT ATT GAC TAC ACC AGC C  |
| Killer/Dr5 R:                                            | ATG TTG CAT CGG GTT TCT ACG    |
| Pidd F:                                                  | TCG CTG TCG TGA GGT AGT TG     |
| Pidd R:                                                  | GAG AAG TGC TCC CTC TGG TG     |
| Perp F:                                                  | GAC CCC AGA TGC TTG TTT TC     |
| Perp R:                                                  | CAG CAG GGT TAT CGT GAA GC     |
| p21 F:                                                   | CTAGGGGAATTGGAGTCAGG           |
| p21 R:                                                   | AGAGACAACGGCACACTTTG           |
| Puma F:                                                  | GCGGCGGAGACAAGAAGA             |
| Puma R:                                                  | AGTCCCATGAAGAGATTGTACATGAC     |
| Noxa F:                                                  | GCAGAGCTACCACCTGAGTTC          |
| Noxa R:                                                  | CTTTTGC GACTTCCCAGGCA          |
| Bax F:                                                   | TGAAGACAGGGGCCTTTTTG           |
| Bax R:                                                   | AATTCGCCGGAGACACTCG            |
| Mdm2 F:                                                  | CTGTGTCTACCGAGGGTGCT           |
| Mdm2R:                                                   | CGCTCCAACGGACTTTAACA           |
| B-Actin F:                                               | TCCTAGCACCATGAAGATCAAGATC      |
| B-Actin R:                                               | CTGCTTGCTGATCCACATCTG          |
| Chd7 F:                                                  | CTT TTC ATG AGC CAC AAA CG     |
| Chd7 R:                                                  | TCT TCT TCA AAA GCT TTG GTC AC |
| Snai1 F:                                                 | TGGAAAGGCCTTCTCTAGGC           |
| Snai1 R:                                                 | AAAGCACGGTTGCAGTGG             |
| Wnt1 F:                                                  | ACAGTAGTGGCCGATGGTG            |
| Wnt1 R:                                                  | CTTGGAATCCGTCAACAGGT           |
| Pax3 F:                                                  | GCGAGAAAAAGGCTAAACACA          |
| Pax3 R:                                                  | CGGAGCCTTCATCTGACTG            |

| Supplemental Methods Table 1b: Human qRT-PCR Primer List |                            |
|----------------------------------------------------------|----------------------------|
| p53 F:                                                   | CAG TTC CTG CAT GGG CGG CA |
| p53 R:                                                   | CGC CGG TCT CTC CCA GGA CA |
| Noxa F:                                                  | CAGCGTTTGCAGATGGTCAA       |
| Noxa R:                                                  | CCCCGAAATTACTTCCTTACAAAA   |
| Bax F:                                                   | GGCCGGGTTGTCGCCCTTTT       |
| Bax R:                                                   | AACAGCCGCTCCCGGAGGAA       |
| Hdm2 F:                                                  | GGTTGACTCAGCTTTTCCTCTTG    |
| Hdm2 R:                                                  | GGAAAATGCATGGTTTAAATAGCC   |
| Actin F:                                                 | ATCCGCCGCCCGTCCACA         |
| Actin R:                                                 | ACCATCACGCCCTGGTGCCT       |
| Perp F:                                                  | GGA CCC CAG ATG CTT GTC TT |
| Perp R:                                                  | AGG GTG AAG GTC TGG GTG TA |
| Killer F:                                                | GTGTCCACAAAGAATCAGGCAT     |
| Killer R:                                                | CCAGGTCGTTGTGAGCTTCT       |
| Pidd F:                                                  | TGTTTCGAGGGCGAAGAGTTC      |
| Pidd R:                                                  | CCACGGTAGAAGGACACCTCC      |

### Supplemental Methods Table 2. p53 and CHD7 ChIP Analysis Primers

| Supplemental Methods Table 2: Mouse qPCR ChIP Primer List |                            |
|-----------------------------------------------------------|----------------------------|
| p21 F:                                                    | GAG ACC AGC AGC AAA ATC G  |
| p21 R:                                                    | CAG CCC CAC CTC TTC AAT TC |
| Bax F:                                                    | GCC TGG CTA CTG CTT CTG AT |
| Bax R:                                                    | TTG GCA TTC TGC TCT CTG GG |
| Noxa F:                                                   | AAG CAA TTT GGG GGT TGA G  |
| Noxa R:                                                   | GAG CGA AGT GGA GCA GGT C  |

|           |                            |
|-----------|----------------------------|
| Pidd F:   | CCT GCT TAG GCA AGG CTG AT |
| Pidd R:   | CTG GTC CCC TAC AGC CTA CT |
|           |                            |
| Killer F: | GGG TTT CGG ATG AGC TGA CA |
| Killer R: | CAA GCA GCA ACG CAA AGC TA |
|           |                            |
| Mdm2 F:   | CTT CCT GTG GGG CTG GTC    |
| Mdm2 R:   | CGG GGC AGC GTT TAA ATA AC |
|           |                            |
| Perp F:   | ACC ACA TCC AGA CAT CGT CG |
| Perp R:   | CTC ACC GTA CTC CAT GAG GC |
|           |                            |
| p53 P1 F: | TTCACAAAGCGTTCCTGCTG       |
| p53 P1 R: | CGCCATAACAAGTAAGGGCAAG     |
|           |                            |
| p53 P2 F: | CCCACCAGTGTGTTGTGATTTC     |
| p53 P2 R: | AGGTGCAGTTCCTAGAACACG      |
|           |                            |
| p53 P3 F: | TCTGAAATGCTTGCCTTTGCTG     |
| p53 P3 R: | ATGCGTATGGAGGTCAGATGAC     |
